# Supplementary material
Source: publisher figshare collection journal article supplement (https://karger.figshare.com/ndownloader/files/13236650)

Fig S4 A Kaplan Meier analysis for all-cause mortality according to the AVR status


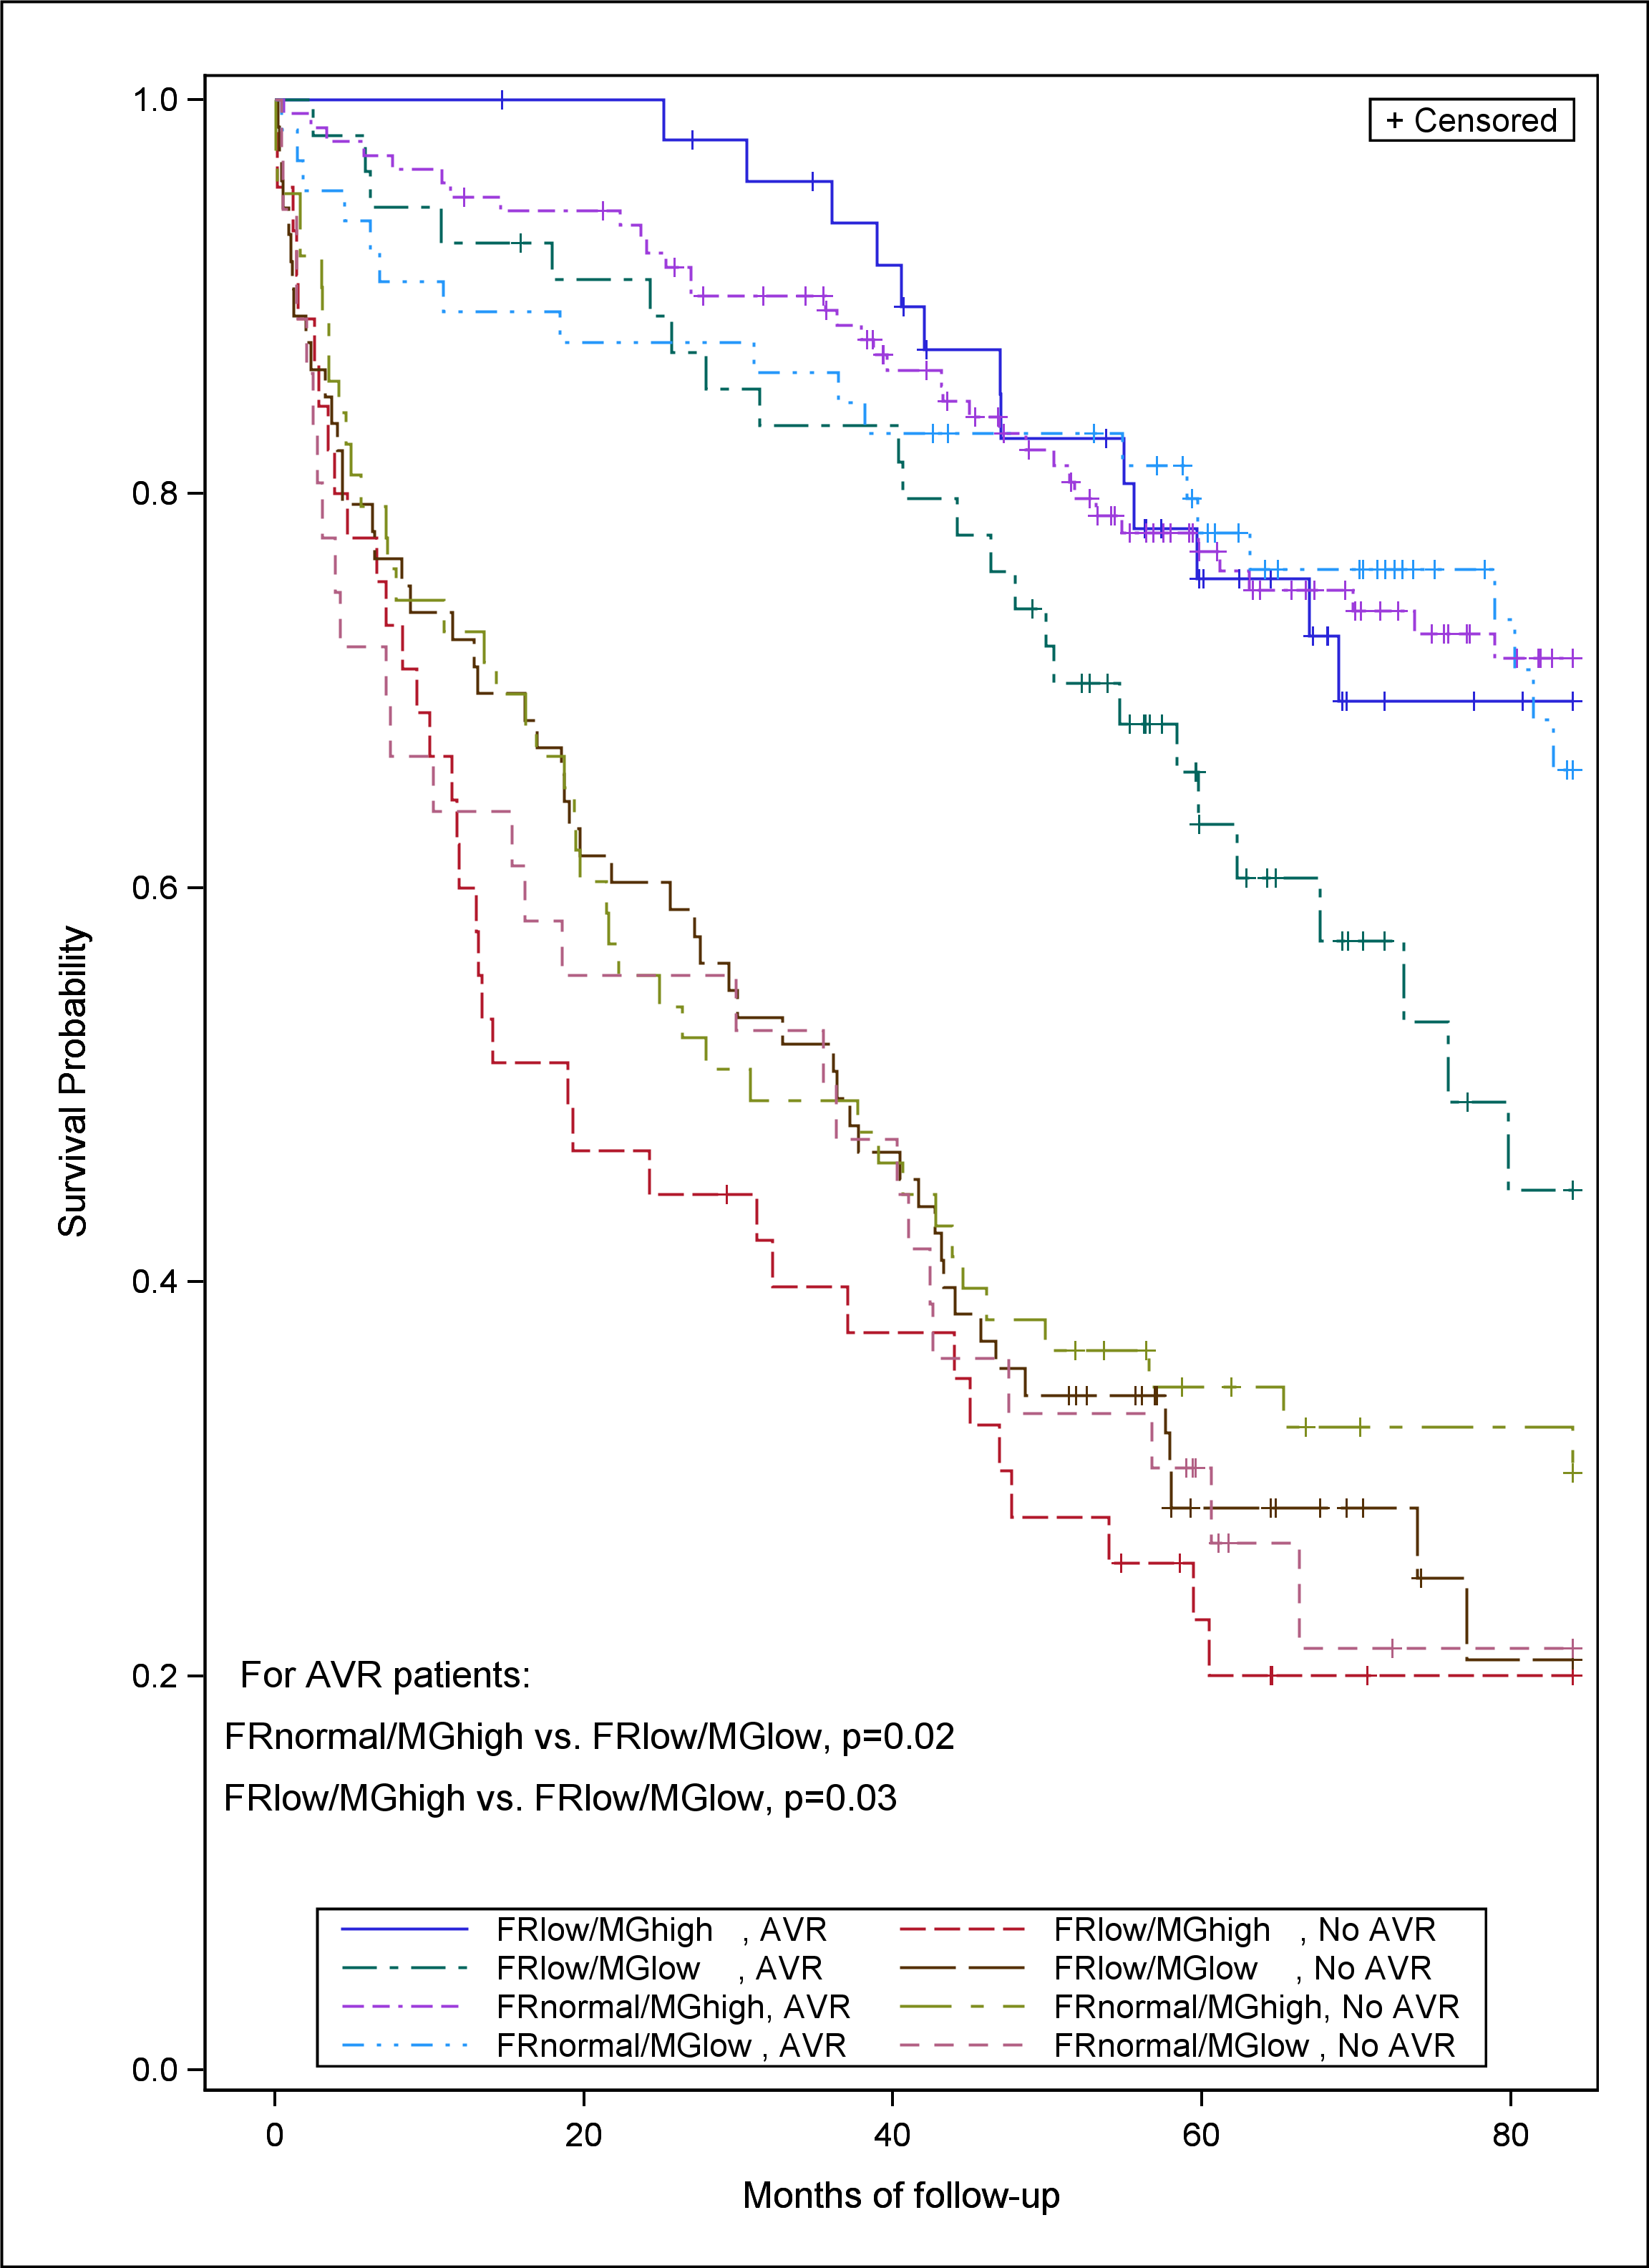

Supplement: Supplementary file 1 [file 13236650]
